# Supplementary figures and images for: Oxytocin's neurochemical effects in the medial prefrontal cortex underlie recovery of task-specific brain activity in autism: a randomized controlled trial
Source: PubMed Central journal article supplement — Mol Psychiatry. 2014 Jul 29;20(4):447–53. doi: 10.1038/mp.2014.74 (PMC4378254; doi:10.1038/mp.2014.74), 2014-07-29

eFigure 1

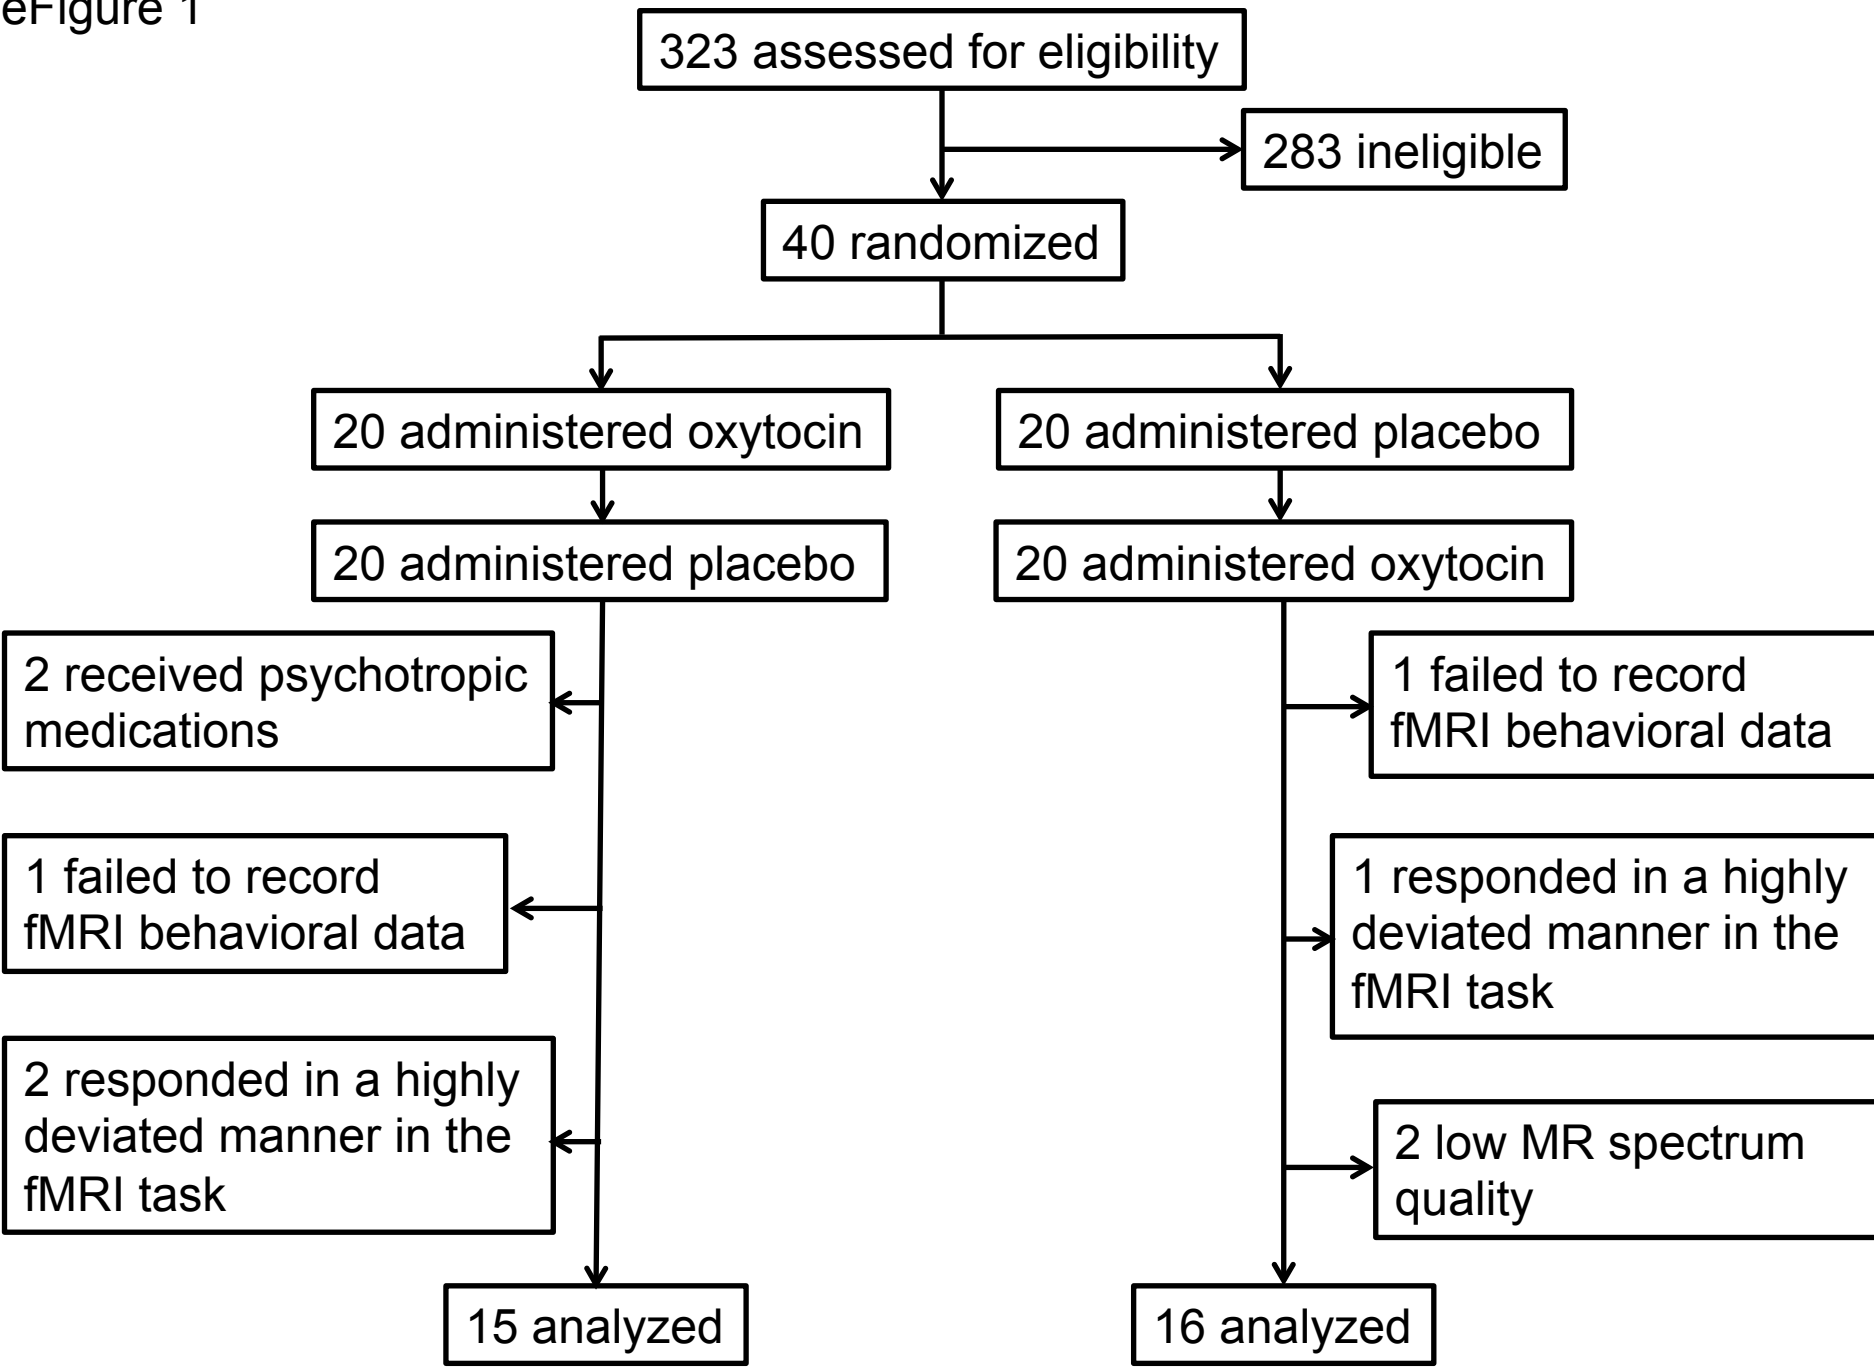

Supplement: mp201474x1.pdf [file mp201474x1.pdf]

eFigure 2

**a**  $R = .439, P = .013$

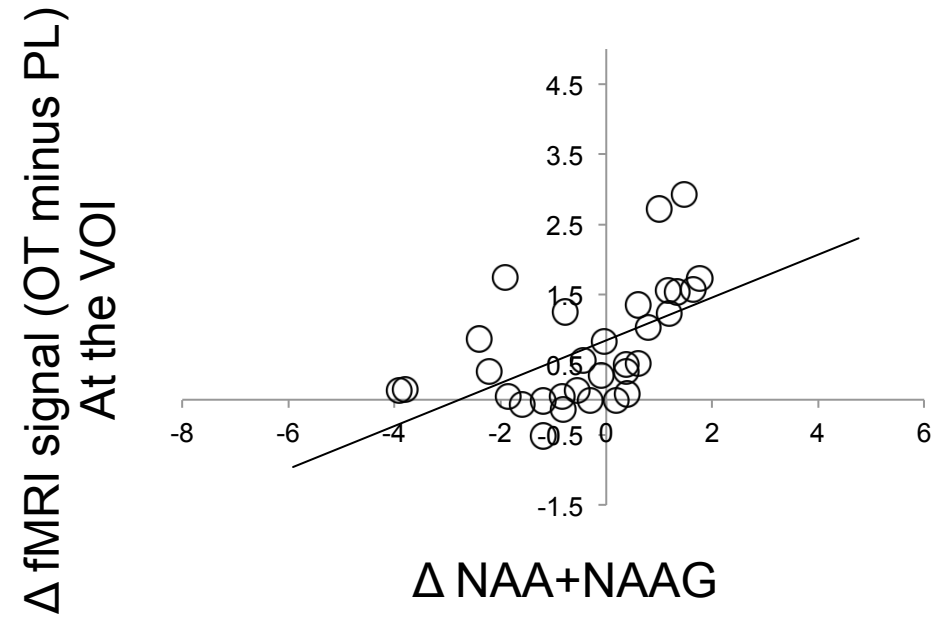

**b**  $R = .349, P = .055$

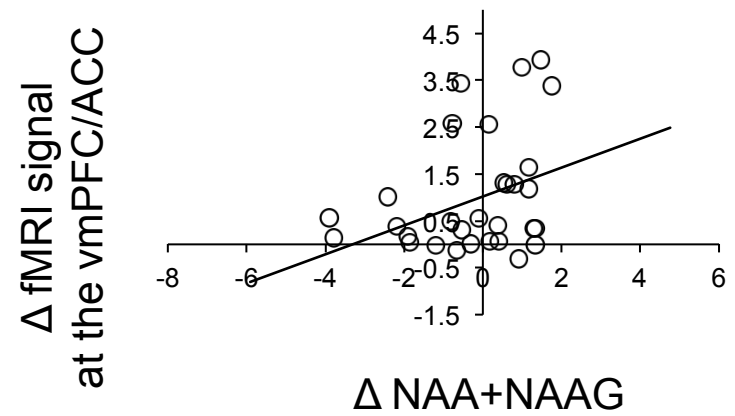

**c**  $R = .284, P = .122$

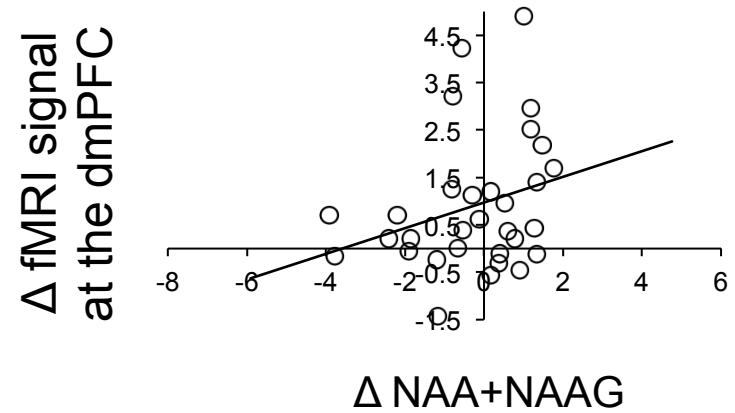

Supplement: mp201474x2.pdf [file mp201474x2.pdf]

eFigure 3

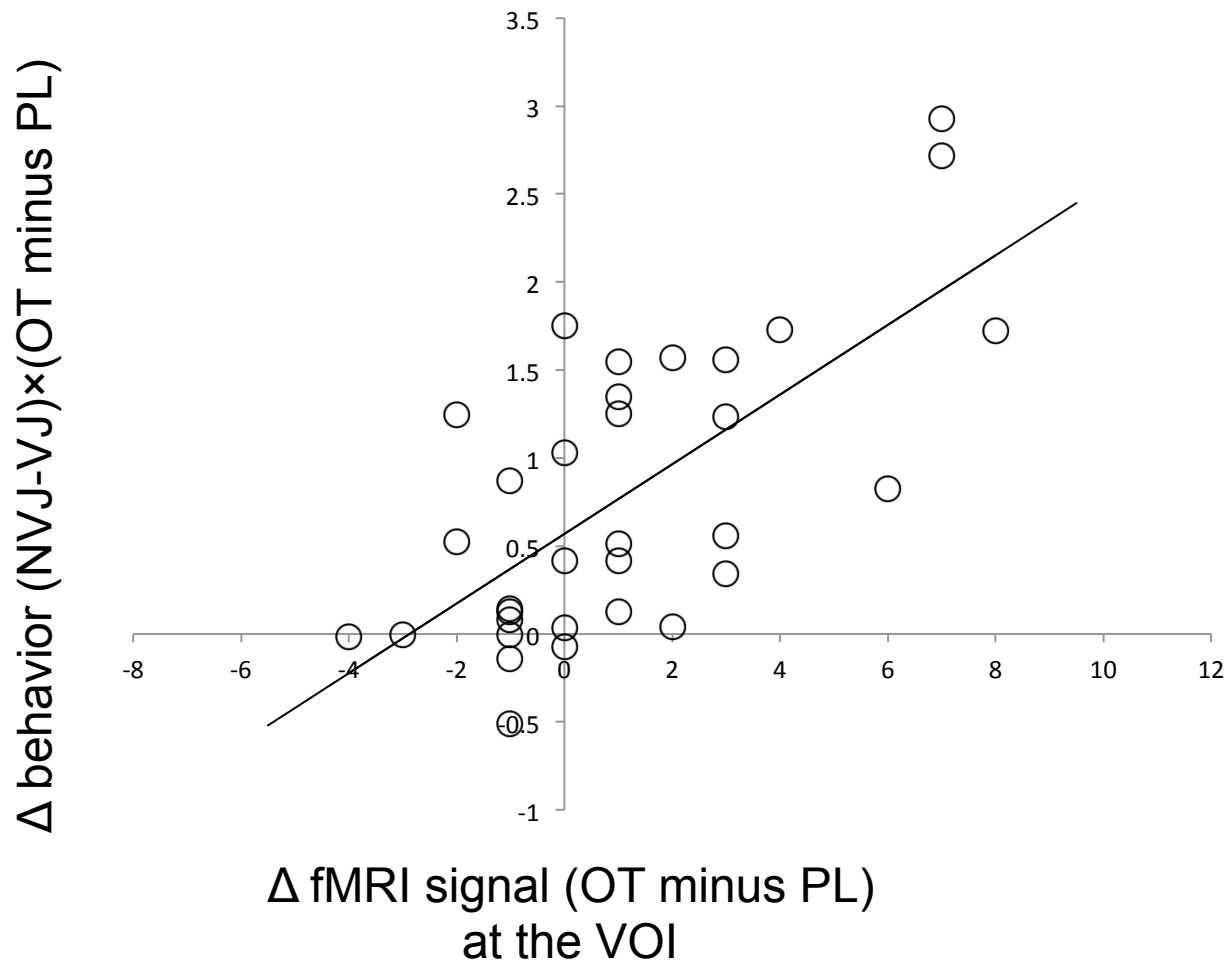

Supplement: mp201474x3.pdf [file mp201474x3.pdf]
